# Supplementary material for: Pressure effects on the thermal decomposition of the LLM-105 crystal
Source: Royal Society of Chemistry journal article supplement (doi:10.1039/d1cp04076f), 2021-12-22
Supplement: d1cp04076f2.pdf [file d1cp04076f2.pdf]

## **Pressure Effects on the Thermal Decomposition of LLM-105 Crystal**

Junke Wang<sup>1</sup>, Chan Gao<sup>2</sup>, Zilong Xu<sup>1</sup>, Cheng Zhong<sup>1</sup>, Rucheng Dai<sup>2\*</sup>, Zhongping Wang<sup>2</sup>,  
Hongzhen Li<sup>3\*</sup>, and Zengming Zhang<sup>2,4\*</sup>

1. Department of Physics, University of Science and Technology of China, Hefei, Anhui 230026, China
2. The Centre for Physical Experiments, University of Science and Technology of China, Hefei, Anhui 230026, China
3. Institute of Chemical Materials, China Academy of Engineering Physics, Mianyang, Sichuan 621900, China
4. Key Laboratory of Strongly-Coupled Quantum Matter Physics, Chinese Academy of Sciences, School of Physical Sciences, University of Science and Technology of China, Hefei, Anhui 230026, China

Author: [Wangjk11@mail.ustc.edu.cn](mailto:Wangjk11@mail.ustc.edu.cn)

Corresponding authors: [dairc@ustc.edu.cn](mailto:dairc@ustc.edu.cn), [hongzhenli@caep.cn](mailto:hongzhenli@caep.cn) and  
[zzm@ustc.edu.cn](mailto:zzm@ustc.edu.cn)

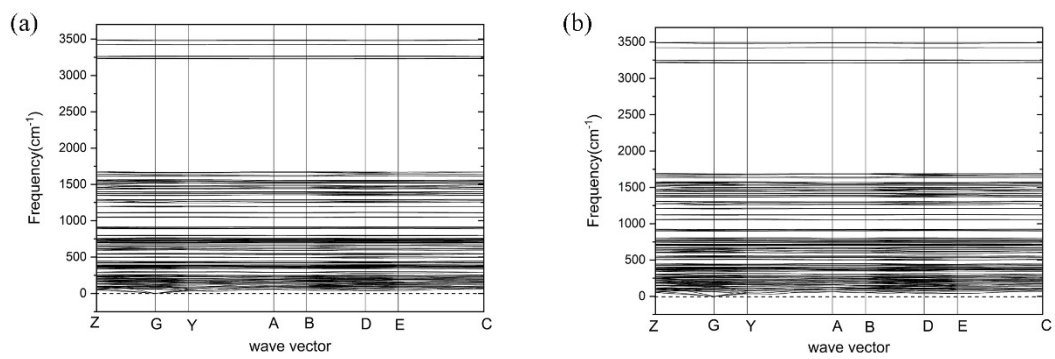

**Figure S1.** Phonon spectra of LLM-105 at high pressures of (a) 6.0GPa (b) 10.2GPa. There is no imaginary phonon mode in the whole Brillouin zone so it is dynamically stable for the initial high pressure structure

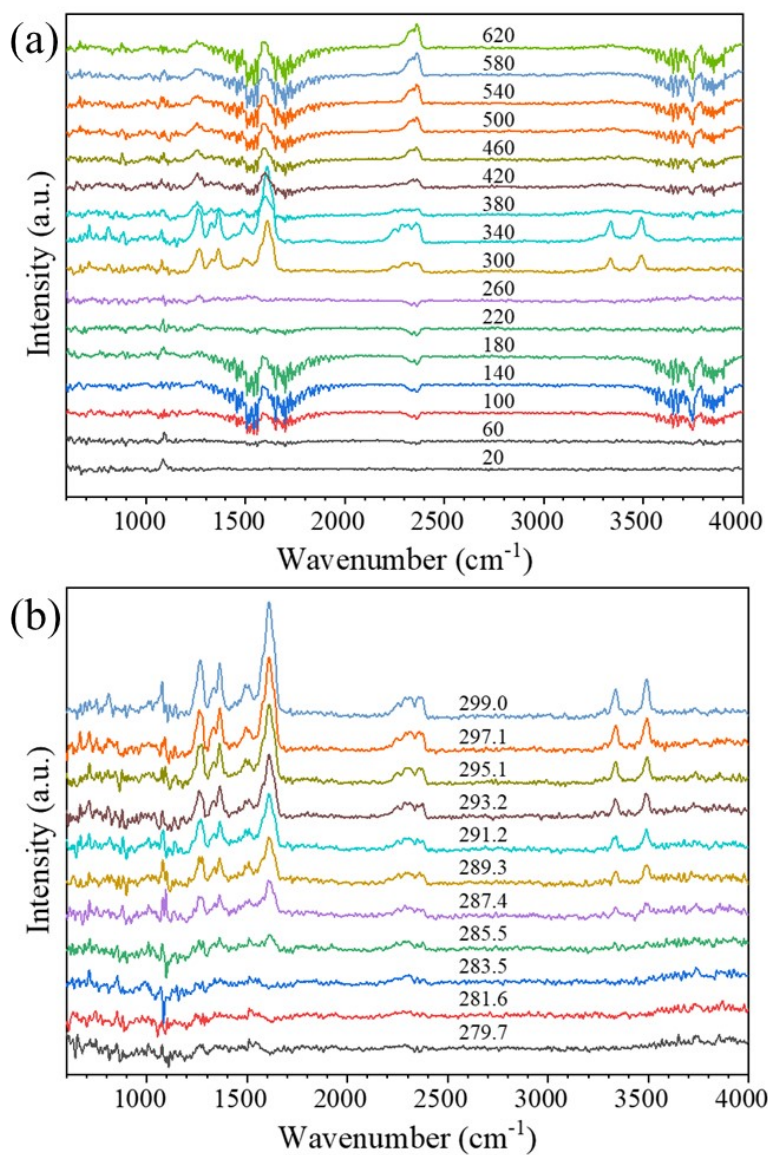

**Figure S2.** The IR spectra of LLM-105 decomposition products at ambient pressure. IR spectra from (a) 20°C to 600°C (b) 279°C to 300°C. IR absorptions for the decomposition products occur around 300 °C

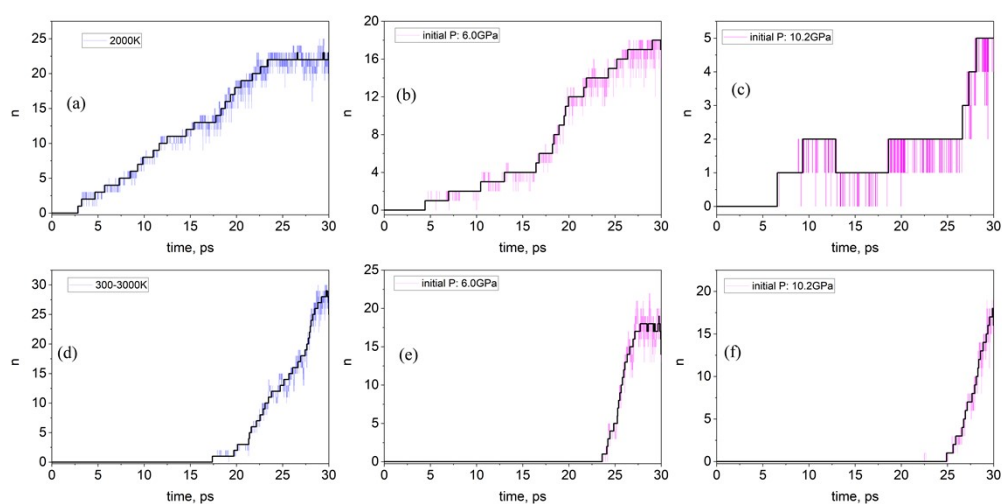

**Figure S3.** Evolution of the number of intermediate NO molecules under various conditions. (a-c) Constant temperature of 2000 K at different initial pressures, 0 GPa, 6.0 GPa and 10.2 GPa; (d-f) Program heating of 300-3000 K at different initial pressures, 0 GPa, 6.0 GPa and 10.2 GPa. The tendency of NO under HP-HT is the same as H<sub>2</sub>O as a final product. High pressure impedes the production of NO at high temperatures.

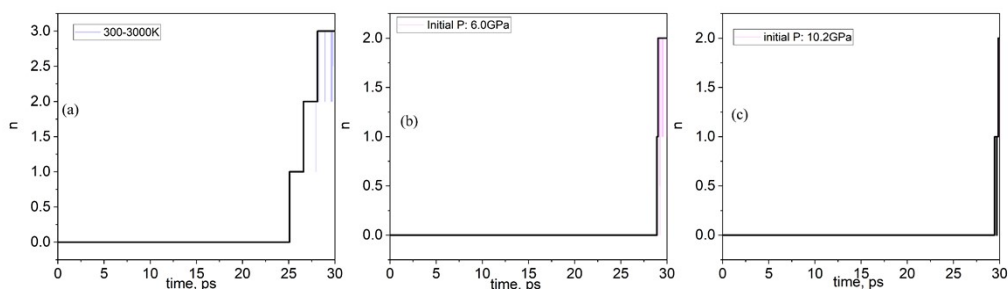

**Figure S4.** Evolution of the number of intermediate  $N_2$  molecules under various conditions. (a-c) Program heating of 300-3000 K at different initial pressures, 0 GPa, 6.0 GPa and 10.2 GPa.  $N_2$  occurs at relatively high temperature, so there is no  $N_2$  at 2000K of different initial pressures. High pressure also impedes the final production of  $N_2$ .

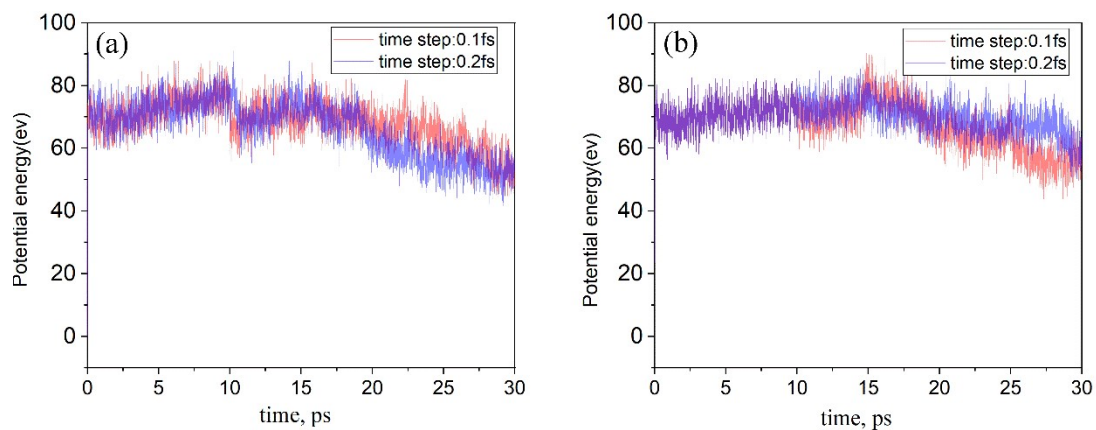

**Figure S5.** Evolution of potential energy at different time step (a-b) constant temperature of 2000 K at different initial pressures of 6.0 GPa, 10.2 GPa. As shown in the figure, the potential energy at time step of 0.1 fs is the same as that at the time step of 0.2 fs. Although at the end of the simulation time, there exists minor accumulation of numerical errors, the tendency of two curves always keep the same. Except for the potential energy, the 0.1 fs time step calculations show the initial decomposition mechanisms and the evolution of major chemical species were almost the same as we discussed with the step time of 0.2 fs. Considering the computational cost, we choose 0.2 fs as the time step.

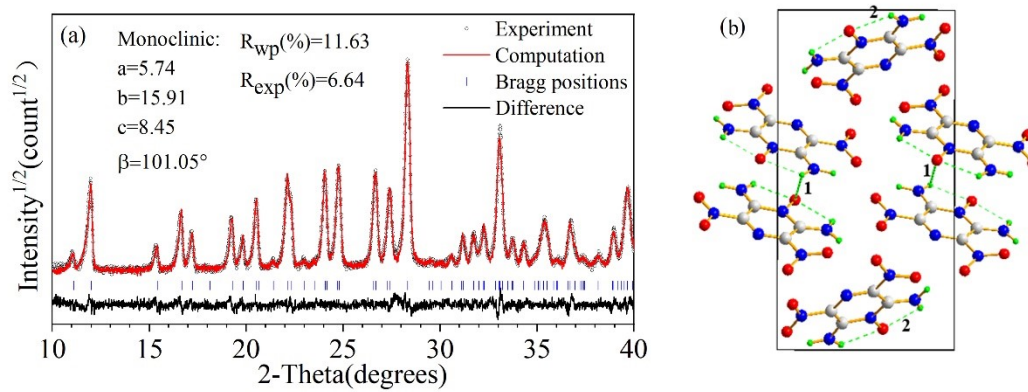

**Figure S6.** Results of refined XRD patterns of LLM-105 crystal at ambient pressure.

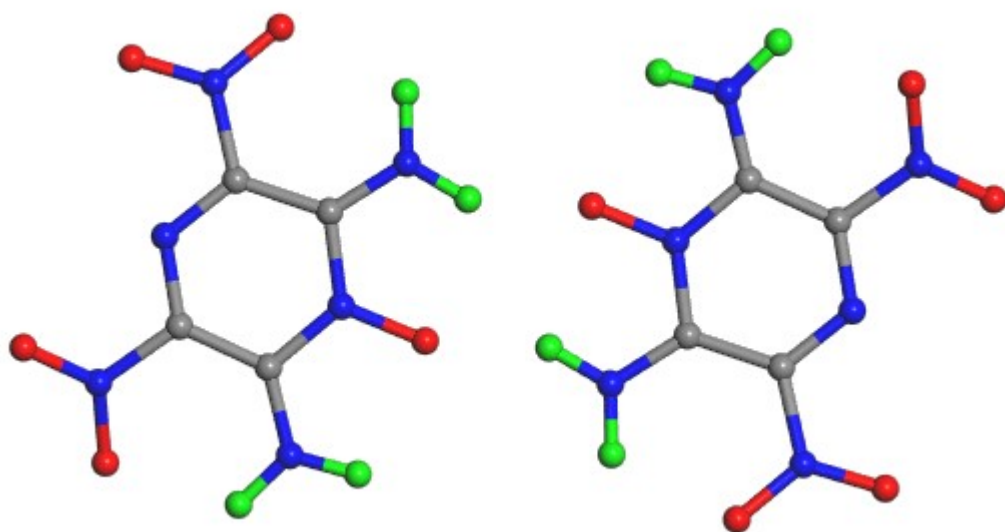

(see more in attached file SV1.gif)

**Figure S7.** The sketch map of intermolecular hydrogen transfer process under HP-HT.
